# Supplementary material for: Terpenoid-Rich Extract of Dillenia indica L. Bark Displays Antidiabetic Action in Insulin-Resistant C2C12 Cells and STZ-Induced Diabetic Mice by Attenuation of Oxidative Stress
Source: MDPI journal article supplement (doi:10.3390/antiox11071227), 2022-06-23
Supplement: s1 [file s1]

## Supplementary data set

**Terpenoid rich extract of *Dillenia indica* L. bark display antidiabetic action in insulin resistant C2C12 cells and STZ-induced diabetic mice by attenuation of oxidative stress**

Bo-Rim Song<sup>1</sup>, Md Badrul Alam<sup>1,2</sup>, Sang-Han Lee<sup>1,2\*\*</sup>

<sup>a</sup>Department of Food Science and Biotechnology, Graduate School, Kyungpook National University, Daegu 41566, Korea

<sup>b</sup>Food and Bio-Industry Research Institute, Inner Beauty/Antiaging Center, Kyungpook National University, Daegu 41566, Korea

\*Corresponding author:

Dr. Sang-Han Lee; Department of Food Science and Biotechnology, Kyungpook National University, Daegu 41566, Korea, Phone: (82)053-950-7754 (Office); (82)010-2537-7659 (Mobile); Fax: 053-950-6772; Email: sang@knu.ac.kr

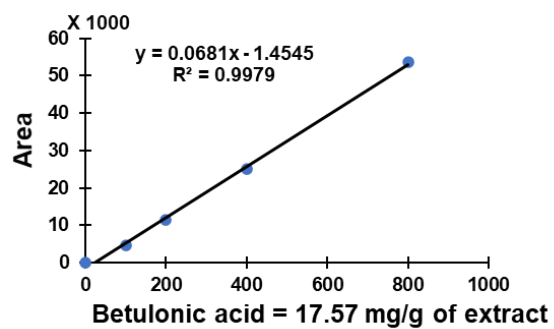

(a)

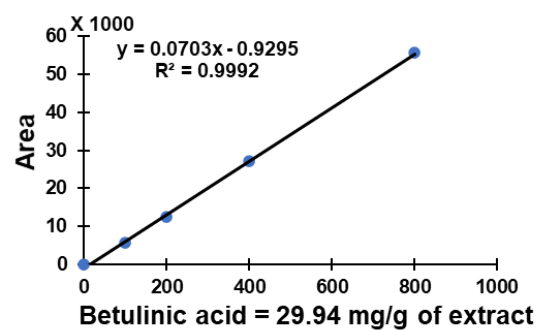

(b)

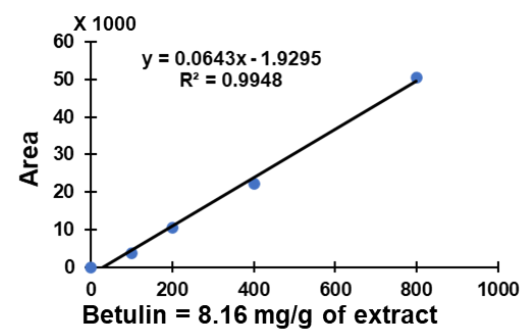

(c)

**Figure S1:** Quantification of pentacyclic triterpenoids presence in *D. indica* bark by HPLC analysis. Betulonic acid (a); betulonic acid (b) and botulin (c).

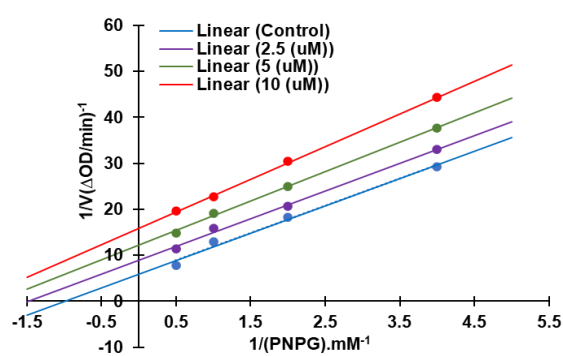

(a)

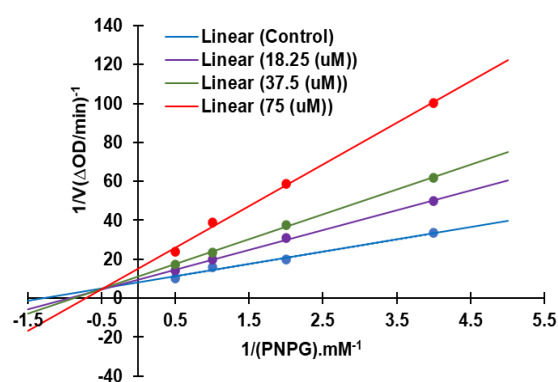

(b)

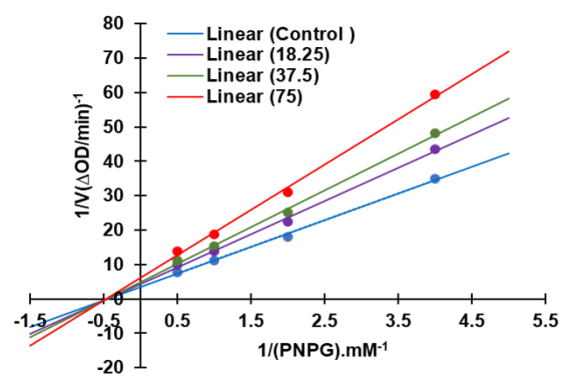

(c)

**Figure S2:** Enzyme kinetic analysis of identified compounds of TRDI by creating a Lineweaver–Burk plot using  $1/\text{substrate concentration}$  vs  $1/\text{absorbance change per min}$ . Betulonic acid (a); betulinic acid (b) and botulin (c).

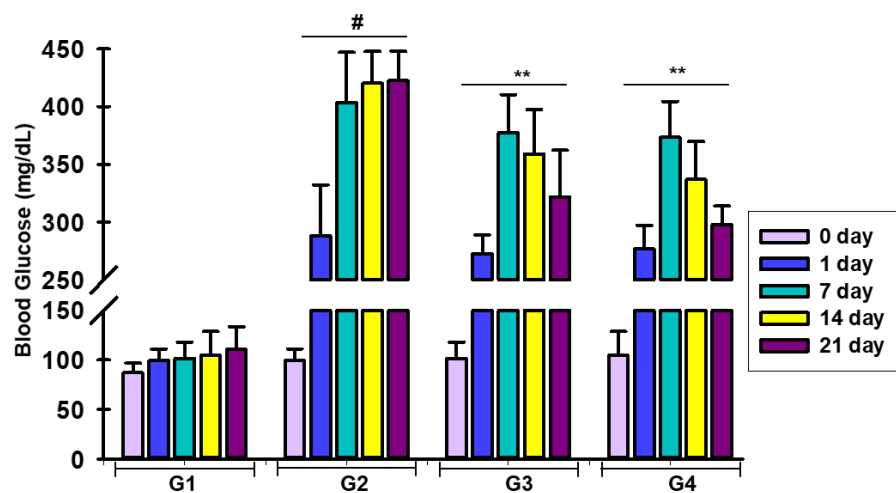

**Figure S3: The effects of TRDI on blood glucose level on STZ-induced diabetic mice.** The blood glucose level was checked before STZ induction (day 0). After STZ induction, mice were treated with TRDI (150 mg/kg) and glibenclamide (5 mg/kg) p.o. for 3 week. Blood glucose level was checked at every week.

**Table S1: List of antibodies used in this study**

| <b>Antibody</b>      | <b>Dilution</b> | <b>Supplier</b>                               | <b>Catalog No.</b> | <b>Host</b> | <b>MW, kDa</b> |
|----------------------|-----------------|-----------------------------------------------|--------------------|-------------|----------------|
| Anti-GLUT4           | 1:1000          | Cell Signaling Technology, Danvers, MA, USA   | 2213               | Mouse       | 50             |
| Anti-IR $\beta$      | 1:1000          | Cell Signaling Technology, Danvers, MA, USA   | 3020               | Mouse       | 95             |
| Anti-p-IRS-1         | 1:1000          | Cell Signaling Technology, Danvers, MA, USA   | 3193               | Mouse       | 180            |
| Anti-IRS-1           | 1:1000          | Cell Signaling Technology, Danvers, MA, USA   | 3194               | Mouse       | 180            |
| Anti-p-Akt           | 1:1000          | Cell Signaling Technology, Danvers, MA, USA   | 9271               | Rabbit      | 60             |
| Anti-Akt             | 1:1000          | Cell Signaling Technology, Danvers, MA, USA   | 4685               | Rabbit      | 60             |
| Anti-p-PDK1          | 1:1000          | Cell Signaling Technology, Danvers, MA, USA   | 3061               | Rabbit      | 58-68          |
| Anti-PDK1            | 1:1000          | Cell Signaling Technology, Danvers, MA, USA   | 5662               | Rabbit      | 58-68          |
| Anti-SOD1            | 1:1000          | Bioworld Technology, Inc.                     | BS91268            | Rabbit      | 23             |
| Anti-catalase        | 1:1000          | Bioworld Technology, Inc.                     | BS90194            | Rabbit      | 68             |
| anti-GPx-1           | 1:1000          | Bioworld Technology, Inc.                     | MB9027             | Mouse       | 92             |
| Anti-HO-1            | 1:1000          | Santa Cruz Biotechnology, Inc.                | sc-136256          | Mouse       | 32             |
| Anti Nrf2            | 1:1000          | Santa Cruz Biotechnology, Inc.                | sc-81342           | Mouse       | 66             |
| Anti-Lamin B         | 1:1000          | Bioworld Technology, Inc.                     | BS3547             | Rabbit      | 66             |
| Anti- $\beta$ -actin | 1:1000          | Santa Cruz Biotechnology, Santa Cruz, CA, USA | Sc-47778           | Mouse       | 43             |

**Table S2: Enzyme kinetic analysis of identified compounds of TRDI**

| Compound       | Concentration (mM)      | K <sub>m</sub> (mM)    | V <sub>max</sub> (ΔOD/min) | Mode of inhibition |
|----------------|-------------------------|------------------------|----------------------------|--------------------|
| Betulin        | NT                      | 2.2 x10 <sup>-3</sup>  | 29.21 x10 <sup>-3</sup>    | Non-competitive    |
|                | 18.25 x10 <sup>-3</sup> | 2.2 x10 <sup>-3</sup>  | 22.62 x10 <sup>-3</sup>    |                    |
|                | 37.5 x10 <sup>-3</sup>  | 2.2 x10 <sup>-3</sup>  | 20.34 x10 <sup>-3</sup>    |                    |
|                | 75 x10 <sup>-3</sup>    | 2.2 x10 <sup>-3</sup>  | 16.21 x10 <sup>-3</sup>    |                    |
| Betulinic acid | NT                      | 1.0 x10 <sup>-3</sup>  | 12.41 x10 <sup>-3</sup>    | Mixed              |
|                | 18.25 x10 <sup>-3</sup> | 1.1 x10 <sup>-3</sup>  | 10.35 x10 <sup>-3</sup>    |                    |
|                | 37.5 x10 <sup>-3</sup>  | 1.2 x10 <sup>-3</sup>  | 8.96 x10 <sup>-3</sup>     |                    |
|                | 75 x10 <sup>-3</sup>    | 1.3 x10 <sup>-3</sup>  | 6.53 x10 <sup>-3</sup>     |                    |
| Betulonic acid | NT                      | 1.00 x10 <sup>-3</sup> | 16.87 x10 <sup>-3</sup>    | Uncompetitive      |
|                | 2.5 x10 <sup>-3</sup>   | 0.68 x10 <sup>-3</sup> | 11.24 x10 <sup>-3</sup>    |                    |
|                | 5 x10 <sup>-3</sup>     | 0.53 x10 <sup>-3</sup> | 8.22 x10 <sup>-3</sup>     |                    |
|                | 10 x10 <sup>-3</sup>    | 0.45 x10 <sup>-3</sup> | 6.28 x10 <sup>-3</sup>     |                    |
